# Supplementary material for: Systematic Chromatin Accessibility Analysis Based on Different Immunological Subtypes of Clear Cell Renal Cell Carcinoma
Source: Front Oncol. 2021 Apr 16;11:575425. doi: 10.3389/fonc.2021.575425 (PMC8085385; doi:10.3389/fonc.2021.575425)
Supplement: Supplementary file 3 [file DataSheet_3.csv]

Supplementary Table 3
	gene	HR	z	pvalue	lower	upper
	Th17.cells	0.001337743	-5.687197021	1.29E-08	0.000136786	0.01308288
	Th2.cells	143544.8079	4.927044457	8.35E-07	1275.125214	16159285.1
	Mast.cells	9.45E-05	-4.895133287	9.82E-07	2.31E-06	0.0038618
	NK.CD56bright.cells	10182.81256	4.807668043	1.53E-06	236.5712708	438302.0447
	TReg	10.99711864	3.961880426	7.44E-05	3.358555429	36.00852241
	NK.cells	2.00E-06	-3.381964757	0.000719694	9.96E-10	0.004015777
	Tgd	0.000170758	-2.596277269	0.009423998	2.44E-07	0.119290655
	iDC	0.002261296	-2.46280514	0.013785481	1.77E-05	0.288289065
	Th1.cells	444.4824809	2.416007358	0.015691744	3.160870182	62503.25526
	Tcm	0.003004037	-2.240574501	0.02505365	1.87E-05	0.483177516
	Neutrophils	0.017503898	-2.194426562	0.028204758	0.000472042	0.649065429
	aDC	9.432378669	2.08783985	0.036812283	1.147343689	77.54412926
	pDC	0.211132586	-2.06571998	0.038854928	0.048271457	0.923464339
	Macrophages	16.25986931	1.836300361	0.066313246	0.828778846	319.0034968
	Tem	0.016009269	-1.402345024	0.160812241	4.95E-05	5.176086583
	NK.CD56dim.cells	15.43764556	1.275086624	0.202278583	0.229925266	1036.514624
	DC	5.81548741	1.157165582	0.247204717	0.294821135	114.713261
	Eosinophils	0.01291823	-0.948808154	0.342718194	1.62E-06	103.0179317
	Cytotoxic.cells	2.242550879	0.769814583	0.441409888	0.2869096	17.52828918
	CD8.T.cells	0.031838685	-0.676446132	0.498757436	1.46E-06	692.7188985
	T.cells	1.723555932	0.606179028	0.544395878	0.296475708	10.01985989
	T.helper.cells	3.844316152	0.374284798	0.708192441	0.003329508	4438.723603
	TFH	0.432910006	-0.236249967	0.813238708	0.000416773	449.6718027
	B.cells	0.675483936	-0.155833444	0.876164308	0.004859953	93.88538256
